# Supplementary material for: A longitudinal study on the performance of in vivo methods to determine the osteochondrotic status of young pigs
Source: PubMed Central journal article supplement (PMC4807589; doi:10.1186/s12917-016-0682-z), 2016-03-24
Supplement: 12917_2016_682_MOESM1_ESM.pdf [file 12917_2016_682_MOESM1_ESM.pdf]

# Analysis scheme

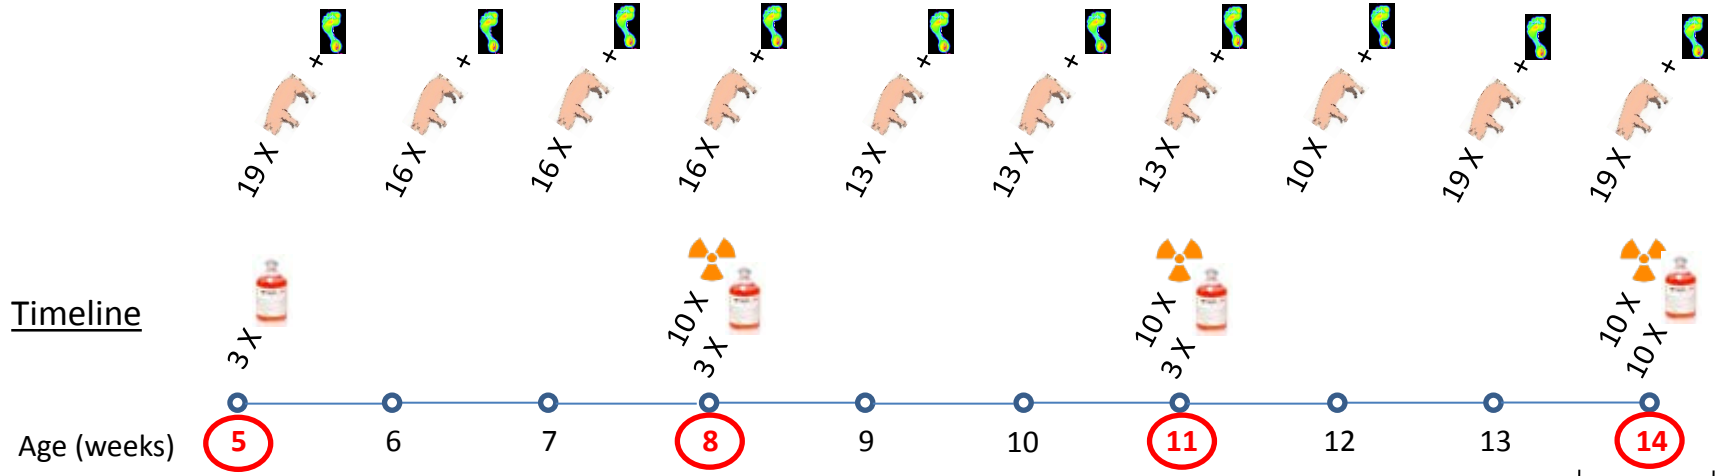

Comparison X-ray and Histology data  
 Comparison Visual scoring and Histology data  
 Comparison Footscan and Histology data

## Legend

- X-rays
- Euthanasia
- Macroscopy
- Histology
- Footscan
- Visual scoring

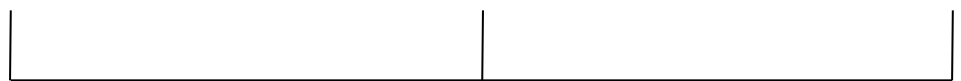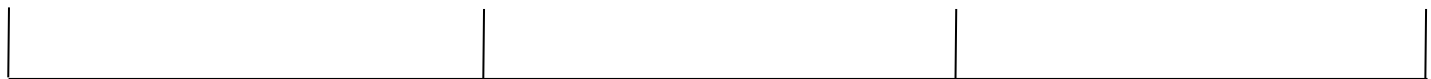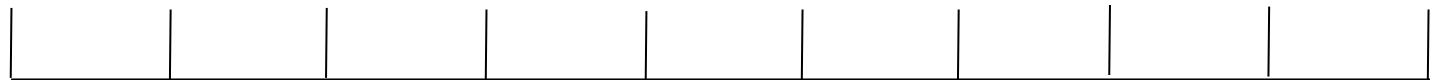

Visual scoring and footscan repeatability
