# Supplementary material for: A longitudinal study on the performance of in vivo methods to determine the osteochondrotic status of young pigs
Source: PubMed Central journal article supplement (PMC4807589; doi:10.1186/s12917-016-0682-z), 2016-03-24
Supplement: 12917_2016_682_MOESM2_ESM.pdf [file 12917_2016_682_MOESM2_ESM.pdf]

Additional File 2. Visual scoring characteristics and scoring categories for anatomical and mobility traits

| Visual characteristics   |                              | Scoring categories            |                                        |                   |
|--------------------------|------------------------------|-------------------------------|----------------------------------------|-------------------|
| <u>Anatomical traits</u> |                              | “Below 4” (1-4)               | “Normal” (4-6)                         | “Above 6” (6-9)   |
| Fore legs                | O or X shape                 | O shape                       |                                        | X shape           |
|                          | Sickled or Buckled           | Sickled                       |                                        | Buckled           |
|                          | Steep or low angled pasterns | Steep                         |                                        | Low               |
|                          | Claw size                    | Inner claw smaller            |                                        | Inner claw larger |
| Hind legs                | O or X shape                 | O shape                       |                                        | X shape           |
|                          | Straight or Sickled          | Straight                      |                                        | Sickled           |
|                          | Steep or low angled pasterns | Steep                         |                                        | Low               |
|                          | Claw size                    | Inner claw smaller            |                                        | Inner claw larger |
| Hams                     | Width                        | Thin                          |                                        | Large             |
| <u>Mobility traits</u>   |                              | Below 9 (1-9)                 |                                        | Above 9 (9-10)    |
|                          | Gait pattern                 | Laboured to severely laboured |                                        | Smooth            |
|                          | Twisting hocks               | Below 2 (1-2)                 | Above 2 (2-10)                         |                   |
|                          | Swaying hind                 | No twisting                   | Noticeable twisting to Severe twisting |                   |
|                          |                              | No swaying                    | Noticeable Swaying Severe swaying      |                   |
