# Supplementary material for: A longitudinal study on the performance of in vivo methods to determine the osteochondrotic status of young pigs
Source: PubMed Central journal article supplement (PMC4807589; doi:10.1186/s12917-016-0682-z), 2016-03-24
Supplement: 12917_2016_682_MOESM3_ESM.pdf [file 12917_2016_682_MOESM3_ESM.pdf]

Additional file 4. Final data set obtained for all pigs for histology and radiography

Table 4a. Radiographic and histological joint assessments for the right side

| Pig ID | Gender | Date | Humerus  |           | Ulna     |           | Femur    |           | Tibia superior |           | Tibia Inferior |           | Talus    |           |
|--------|--------|------|----------|-----------|----------|-----------|----------|-----------|----------------|-----------|----------------|-----------|----------|-----------|
|        |        |      | Medial_R | Lateral_R | Medial_R | Lateral_R | Medial_R | Lateral_R | Medial_R       | Lateral_R | Medial_R       | Lateral_R | Medial_R | Lateral_R |
| 2571   | Male   | 5    | H+R      | H+R       | H+R      | H+R       | H+R      | H+R       | R              | R         | H+R            | H+R       | H+R      | H+R       |
| 2372   | Female | 5    | H+R      | H+R       | H+R      | H+R       | H+R      | H+R       | H+R            | H+R       | H+R            | H+R       | H+R      | H+R       |
| 2381   | Male   | 5    | H+R      | H+R       | H+R      | H+R       | H+R      | H+R       | H+R            | H+R       | H+R            | H+R       | H+R      | H+R       |
| 2387   | Female | 8    | H+R      | H+R       | H+R      | H+R       | H+R      | H+R       | H+R            | H+R       | H+R            | H+R       | H+R      | H+R       |
| 2405   | Female | 8    | H+R      | H+R       | H+R      | H+R       | H+R      | H+R       | H+R            | H+R       | H+R            | H+R       | H+R      | H+R       |
| 2585   | Male   | 8    | H+R      | H+R       | H+R      | H+R       | H+R      | H+R       | H+R            | H+R       | H+R            | H+R       | H+R      | H+R       |
| 1932   | Female | 11   | H+R      | H+R       | H+R      | H+R       | H+R      | H+R       | H+R            | H+R       | H+R            | H+R       | H+R      | H+R       |
| 2412   | Male   | 11   | H+R      | H+R       | H+R      | H+R       | H+R      | H+R       | H+R            | H+R       | H+R            | H+R       | H+R      | H+R       |
| 2566   | Female | 11   | H+R      | H+R       | H+R      | H+R       | H+R      | H+R       | H+R            | H+R       | H+R            | H+R       | H+R      | H+R       |
| 2420   | Female | 14   | H+R      | R         | R        | H+R       | H+R      | H+R       | R              | R         | H+R            | H+R       | H+R      | R         |
| 2431   | Male   | 14   | H+R      | H+R       | R        | H+R       | H+R      | H+R       | H+R            | R         | H+R            | R         | H+R      | R         |
| 2441   | Male   | 14   | H+R      | H+R       | R        | R         | H+R      | H+R       | R              | R         | H+R            | R         | H+R      | R         |
| 2454   | Female | 14   | H+R      | R         | R        | H+R       | H+R      | H+R       | R              | R         | H+R            | R         | H+R      | R         |
| 2461   | Male   | 14   | R        | H+R       | R        | R         | H+R      | H+R       | H+R            | R         | H+R            | R         | H+R      | R         |
| 2583   | Female | 14   | H+R      | H+R       | R        | H+R       | H+R      | H+R       | R              | R         | H+R            | R         | H+R      | R         |
| 2593   | Female | 14   | H+R      | R         | R        | H+R       | H+R      | H+R       | R              | R         | H+R            | R         | H+R      | H+R       |
| 2599   | Male   | 14   | H+R      | R         | R        | H+R       | H+R      | H+R       | H+R            | R         | H+R            | R         | H+R      | H+R       |
| 2396   | Male   | 14   | H+R      | H+R       | R        | H+R       | H+R      | H+R       | R              | R         | H+R            | R         | H+R      | R         |
| 1939   | Male   | 14   | H+R      | R         | R        | H+R       | H+R      | R         | R              | R         | H+R            | R         | R        | H+R       |

Table 4b. Radiographic and histological joint assessments for the left side

| Pig ID | Gender | Date | Humerus  |           | Ulna     |           | Femur    |           | Tibia superior |           | Tibia Inferior |           | Talus    |           |
|--------|--------|------|----------|-----------|----------|-----------|----------|-----------|----------------|-----------|----------------|-----------|----------|-----------|
|        |        |      | Medial_L | Lateral_L | Medial_L | Lateral_L | Medial_L | Lateral_L | Medial_L       | Lateral_L | Medial_L       | Lateral_L | Medial_L | Lateral_L |
| 2571   | Male   | 5    | H+R      | H+R       | H+R      | H+R       | H+R      | H+R       | H+R            | H+R       | H+R            | H+R       | H+R      | H+R       |
| 2372   | Female | 5    | H+R      | H+R       | H+R      | H+R       | H+R      | H+R       | H+R            | H+R       | H+R            | H+R       | H+R      | H+R       |
| 2381   | Male   | 5    | H+R      | H+R       | H+R      | H+R       | H+R      | H+R       | R              | R         | R              | R         | H+R      | H+R       |
| 2387   | Female | 8    | H+R      | H+R       | H+R      | H+R       | H+R      | H+R       | H+R            | H+R       | H+R            | H+R       | H+R      | H+R       |
| 2405   | Female | 8    | H+R      | H+R       | H+R      | H+R       | H+R      | H+R       | H+R            | H+R       | H+R            | H+R       | H+R      | H+R       |
| 2585   | Male   | 8    | H+R      | H+R       | H+R      | H+R       | H+R      | H+R       | H+R            | H+R       | H+R            | H+R       | H+R      | H+R       |
| 1932   | Female | 11   | R        | R         | R        | R         | R        | R         | R              | R         | R              | R         | R        | R         |
| 2412   | Male   | 11   | R        | R         | R        | R         | R        | R         | R              | R         | R              | R         | R        | R         |
| 2566   | Female | 11   | R        | R         | R        | R         | R        | R         | R              | R         | R              | R         | R        | R         |
| 2420   | Female | 14   | H+R      | H+R       | R        | R         | H+R      | H+R       | H+R            | R         | R              | R         | R        | H+R       |
| 2431   | Male   | 14   | H+R      | H+R       | R        | R         | H+R      | H+R       | R              | R         | R              | R         | R        | H+R       |
| 2441   | Male   | 14   | H+R      | R         | R        | R         | H+R      | H+R       | R              | R         | R              | R         | R        | H+R       |
| 2454   | Female | 14   | H+R      | H+R       | R        | R         | H+R      | H+R       | R              | R         | R              | R         | R        | H+R       |
| 2461   | Male   | 14   | H+R      | H+R       | R        | R         | H+R      | H+R       | R              | R         | R              | R         | R        | H+R       |
| 2583   | Female | 14   | H+R      | R         | R        | R         | H+R      | H+R       | R              | R         | R              | R         | R        | H+R       |
| 2593   | Female | 14   | R        | H+R       | R        | R         | H+R      | H+R       | R              | H+R       | R              | R         | H+R      | R         |
| 2599   | Male   | 14   | R        | H+R       | R        | R         | H+R      | H+R       | R              | R         | R              | R         | R        | H+R       |
| 2396   | Male   | 14   | R        | H+R       | R        | R         | H+R      | H+R       | R              | R         | R              | R         | R        | H+R       |
| 1939   | Male   | 14   | R        | H+R       | R        | R         | H+R      | H+R       | R              | R         | R              | R         | H+R      | H+R       |

**Legend**

H: Histological assessments

R: Radiological assessments

Blue: OC radiographically negative samples (control samples)

Red: OC radiographically positive samples (at one or multiple time points) found to be positive during visual examination of cut sample prior to histology

Brown: OC radiographically positive sample (at one time point) that was found to be negative during visual examination of cut sample prior to histology

Purple: OC radiographically positive sample, unsuccessfully processed for histology
